# Supplementary material
Source: publisher site journal article supplement (https://www.dovepress.com/article/343308)
Supplement: Supplementary file 1 [file get_supplementary_file.php]

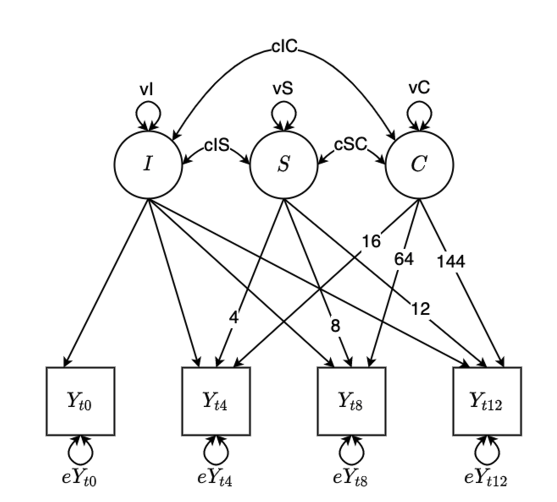
*Supplementary Figure 1. Example path diagram for the LGC models used in the current study. LGCs are a form of structural equation model for modeling longitudinal processes. Squares represent outcome variables at baseline, 4 weeks, 8 weeks, and 12 weeks. Circles represent average latent intercept (I), slope (S), and curvature (C) components across all participants. Single-headed arrows represent fixed loadings relating the outcome variables to the latent components. Double-headed arrows represent either variance, covariance, or error variance parameters: variance of the intercept (vI), slope (vS) and curvature (vC); covariance between intercept and slope (cIS), slope and curvature (cSC), and intercept and curvature (cIC); error variance across measurement time points - at baseline (eYt0), 4 (eYt4), 8 (eYt8) and 12 (eYt12) weeks.*

Latent growth curve (LGC) models take the form:

*Yij* = *I* + *Sti*+ *Cti* + *uIj* + *usjti* + *ucjti* + *eij*

where *Y* is the outcome score for person, *j*, at time, *i*, *ti* is a vector of time points representing [0, 4, 8, 12] weeks, *I* is an intercept term representing the average value at *t=0* for all participants, *S* is a slope term representing the average linear change of *Yij*  over time for all participants, *C* is a curvature term representing the quadratic change over time of *Yij* for all participants, *uij* is a random intercept term representing individual participant variation in *I*, *usj* is a random slope term representing individual participant variation in *S*, *ucj* is a random curvature term representing individual participant variation in *C*, and *eij*is an error term (see Supplementary Figure 1).

*Supplementary Table S1. Baseline characteristics of Completers and Non-completers*

| Characteristic | Completers  (N=234) | Non-completers  (N=62) | *p* |
| --- | --- | --- | --- |
| Age (years), mean (SD) | 51.7 (0.7) | 47.7 (1.7) | **0.034** |
| Age categories, N (%): |  |  | **0.013** |
| - <25 | 2 (0.9) | 0 (0.0) |  |
| - 25-40 | 35 (15.0) | 20 (32.3) |  |
| - 40-60 | 137 (58.5) | 32 (51.6) |  |
| - > 60 | 60 (25.6) | 10 (16.1) |  |
| Sex (females), N (%) | 124 (53.0) | 32 (51.6) | 0.847 |
| BMI, mean (SD) | 28.6 (0.4) | 28.8 (7.0) | 0.608 |
| BMI categories, N (%): |  |  | 0.460 |
| - Underweight (<18.5) | 2 (0.9) | 1 (1.6) |  |
| - Normal (18.5-25) | 74 (31.6) | 12 (19.7) |  |
| - Overweight (25-30) | 80 (34.2) | 25 (41.0) |  |
| - Obese (30-40) | 66 (28.2) | 19 (31.1) |  |
| - Obese grade III (>40) | 12 (5.1) | 4 (6.6) |  |
| Employment status, N (%): |  |  | 0.870 |
| - Employed   (part-time or full-time) | 217 (92.7) | 58 (93.5) |  |
| - Unemployed/Retired | 17 (7.2) | 4 (6.5) |  |
| Occupation type, N (%): |  |  | 0.070 |
| - White collar | 151 (64.5) | 33 (53.2) |  |
| - Blue collar | 54 (23.1) | 20 (32.3) |  |
| - Not applicable (e.g. retired) | 29 (12.4) | 9 (14.6) |  |
| Outcome measures |  |  |  |
| QuickDASH  mean (SD) | 25.6 (12.1) | 28.7 (15.6) | 0.150 |
| Pain Level  mean (SD) | 4.5 (1.8) | 4.9 (2.0) | 0.203 |
| Taking medication  N (%) | 86 (36.8) | 22 (35.5) | 0.854 |
| Surgery Intent  mean (SD) | 12.6 (19.7) | 16.2 (25.8) | 0.311 |
| FABQ-PA  mean (SD) | 11.7 (5.5) | 11.8 (5.8) | 0.855 |
| GAD-7  mean (SD) | 3.3 (3.8) | 3.7 (4.2) | 0.452 |
| PHQ-9  mean (SD) | 3.0 (3.2) | 3.8 (4.0) | 0.123 |
| WPAI Overall  mean (SD) | 13.2 (17.2) | 18.3 (23.8) | 0.147 |
| WPAI Work  mean (SD) | 12.1 (16.2) | 15.4 (20.0) | 0.210 |
| WPAI Time  mean (SD) | 2.0 (9.1) | 5.5 (20.0) | 0.214 |
| WPAI Activity  mean (SD) | 22.8 (20.4) | 26.8 (23.1) | 0.183 |
| Abbreviations: BMI, Body mass index; QuickDASH, Quick Disabilities of the Arm, Shoulder and Hand questionnaire; GAD-7, Generalized Anxiety Disorder 7-item scale; PHQ-9, Patient Health 9-item questionnaire; FABQ-PA, Fear-Avoidance Beliefs Questionnaire for physical activity (FABQ-PA); WPAI, Work Productivity and Activity Impairment questionnaire.  Note: *Significant p-values are presented in bold.* | | | |

*Supplementary Table S2. Unconditional Latent Growth Curve analysis: per protocol*

|  |  | Intercept | | Slope | | Curve | |  |  |
| --- | --- | --- | --- | --- | --- | --- | --- | --- | --- |
| Outcome | N | Mean (SD) | *p* | Mean (SD) | *p* | Mean (SD) | *p* | Mean Change (95%CI) | % Change |
| QuickDASH | 234 | 25.46 (10.96) | **<.001** | -1.56 (1.95) | **<.001** | 0.04 (0.12) | **0.014** | 13.02  (11.59; 14.45) | 51.1% |
| Pain Level | 234 | 4.50 (1.27) | **<.001** | -0.41 (0.37) | **<.001** | 0.02 (0.03) | **<.001** | 2.46  (2.17; 2.74) | 54.6% |
| Surgery Intent >0 | 125 | 22.54 (20.44) | **<.001** | -2.65 (5.03) | **<.001** | 0.13 (0.24) | **0.006** | 12.54  (7.59; 17.48) | 53.2% |
| GAD-7 ≥5 | 66 | 8.29 (3.47) | **<.001** | -0.91 (0.84) | **<.001** | 0.05 (0.06) | **<.001** | 4.21  (3.02; 5.41) | 50.8% |
| PHQ-9 ≥5 | 61 | 7.40 (1.67) | **<.001** | -0.78 (0.82) | **<.001** | 0.03 (0.06) | **0.006** | 4.58  (3.48; 5.67) | 61.9% |
| FABQ-PA | 234 | 11.65 (4.10) | **<.001** | -0.35 (0.61) | **0.002** | 0 (0.03) | 0.858 | 4.40  (3.51; 5.29) | 37.8% |
| WPAI Overall >0 | 109 | 23.74 (11.61) | **<.001** | -2.30 (3.55) | **<.001** | 0.08 (0.33) | 0.067 | 15.58  (11.40; 19.76) | 65.6% |
| WPAI Work >0 | 104 | 22.82 (13.61) | **<.001** | -2.31 (3.15) | **<.001** | 0.09 (0.29) | **0.057** | 15.29  (11.18; 19.41) | 67.0% |
| WPAI Activity >0 | 183 | 28.44 (10.37) | **<.001** | -2.73 (0.03) | **<.001** | 0.12 (0.12) | **0.003** | 16.04  (12.59; 19.49) | 56.4% |
| Abbreviations: QuickDASH, Quick Disabilities of the Arm, Shoulder and Hand questionnaire; GAD-7, Generalized Anxiety Disorder 7-item scale; PHQ-9, Patient Health 9-item questionnaire; FABQ-PA, Fear-Avoidance Beliefs Questionnaire for physical activity (FABQ-PA); WPAI, Work Productivity and Activity Impairment questionnaire.  Note: *Significant p-values are presented in bold.* | | | | | | | | | |

*Supplementary Table S3. Unconditional Latent Growth Curve analysis: intent-to-treat*

|  |  | Intercept | | Slope | | Curve | |  |  |
| --- | --- | --- | --- | --- | --- | --- | --- | --- | --- |
| Outcome | N | Mean (SD) | *p* | Mean (SD) | *p* | Mean (SD) | *p* | Mean Change (95%CI) | % Change |
| QuickDASH | 296 | 26.07 (10.35) | **<.001** | -1.61 (1.40) | **<.001** | 0.04 (0.11) | **0.012** | 13.45  (11.99; 14.92) | 51.6% |
| Pain Level | 296 | 4.56 (0.87) | **<.001** | -0.41 (0.27) | **<.001** | 0.02 (0.03) | **<.001** | 2.50  (2.22; 2.77) | 54.8% |
| Surgery Intent >0 | 161 | 24.38 (16.73) | **<.001** | -2.72 (2.45) | **<.001** | 0.13 (0.03) | **0.004** | 13.53  (8.84; 18.23) | 55.5% |
| Surgery Intent (all) | 296 | 13.27 (15.65) | **<.001** | -1.25 (1.42) | **<.001** | 0.06 (0.3) | **0.03** | 7.11  (4.36; 9.86) | 53.5% |
| GAD-7 ≥5 | 87 | 8.30 (2.45) | **<.001** | -0.91 (0.29) | **<.001** | 0.05 (0.04) | **<.001** | 4.18  (3.00; 5.36) | 50.3% |
| GAD-7 (all) | 296 | 3.34 (2.99) | **<.001** | -0.28 (0.28) | **<.001** | 0.01 (0.03) | **0.009** | 1.47  (0.95; 1.99) | 43.9% |
| PHQ-9 ≥5 | 79 | 7.74 (0.72) | **<.001** | -0.88 (0.64) | **<.001** | 0.04 (0.05) | **0.002** | 4.92  (3.86; 5.99) | 63.6% |
| PHQ-9 (all) | 296 | 3.13 (2.51) | **<.001** | -0.31 (0.39) | **<.001** | 0.01 (0.03) | **<.001** | 1.66  (1.21; 2.11) | 53.0% |
| FABQ-PA | 296 | 11.70 (4.41) | **<.001** | -0.32 (0.71) | **0.002** | 0 (0.03) | 0.622 | 4.41  (3.55; 5.27) | 37.7% |
| WPAI Overall >0 | 141 | 25.27 (12.97) | **<.001** | -2.71 (3.46) | **<.001** | 0.11 (0.32) | **0.023** | 16.81  (12.30; 21.31) | 66.5% |
| WPAI Overall (all) | 251 | 13.97 (14.29) | **<.001** | -1.21 (2.41) | **<.001** | 0.04 (0.22) | 0.111 | 8.24  (5.37; 11.11) | 58.9% |
| WPAI Work >0 | 136 | 23.46 (13.48) | **<.001** | -2.45 (3.43) | **<.001** | 0.09 (0.3) | **0.044** | 15.93  (11.51; 20.36) | 67.9% |
| WPAI Work (all) | 251 | 12.44 (10.35) | **<.001** | -0.99 (2.58) | **0.001** | 0.03 (0.2) | 0.184 | 6.86  (3.99; 9.72) | 55.1% |
| WPAI Activity >0 | 236 | 29.01 (11.69) | **<.001** | -2.80 (2.52) | **<.001** | 0.12 (0.19) | **0.003** | 16.33  (12.80; 19.86) | 56.3% |
| WPAI Activity (all) | 296 | 23.03 (13.04) | **<.001** | -1.94 (1.93) | **<.001** | 0.07 (0.18) | **0.025** | 12.54  (9.65; 15.43) | 54.5% |
| Abbreviations: QuickDASH, Quick Disabilities of the Arm, Shoulder and Hand questionnaire; GAD-7, Generalized Anxiety Disorder 7-item scale; PHQ-9, Patient Health 9-item questionnaire; FABQ-PA, Fear-Avoidance Beliefs Questionnaire for physical activity (FABQ-PA); WPAI, Work Productivity and Activity Impairment questionnaire.  Note*: Significant p-values are presented in bold.* | | | | | | | | | |

*Supplementary Table S4. Model fit assessment for the unconditional Latent Growth Curve analysis: intent-to-treat*

|  | Fit | | | | |
| --- | --- | --- | --- | --- | --- |
| Outcome | Chi-sq (1) | *p* | RMSEA | CFI | SRMR |
| QuickDASH | 4.3 | **0.116** | **0.062** | **0.99** | **0.031** |
| Pain Level | 13.22 | 0.001 | 0.138 | **0.90** | 0.08 |
| Surgery Intent >0 | 2.96 | **0.228** | **0.060** | **0.99** | **0.047** |
| Surgery Intent (all) | 6.39 | 0.041 | 0.086 | **0.98** | 0.06 |
| GAD-7 ≥5 | 5.39 | **0.068** | 0.154 | 0.89 | 0.069 |
| GAD-7 (all) | 12.9 | 0.002 | 0.136 | **0.96** | 0.051 |
| PHQ-9 ≥5 | 0.56 | **0.756** | **<.001** | **1.00** | **0.023** |
| PHQ-9 (all) | 8.2 | 0.017 | 0.102 | **0.98** | **0.040** |
| FABQ-PA | 1.31 | **0.521** | **<.001** | **1.00** | **0.014** |
| WPAI Overall >0 | 1.27 | **0.53** | **<.001** | **1.00** | **0.034** |
| WPAI Overall (all) | 1.54 | **0.464** | **<.001** | **1.00** | **0.022** |
| WPAI Work >0 | 1.63 | **0.442** | **<.001** | **1.00** | **0.045** |
| WPAI Work (all) | 3.11 | **0.211** | **0.046** | **0.99** | **0.029** |
| WPAI Activity >0 | 8.52 | 0.014 | 0.129 | **0.93** | 0.05 |
| WPAI Activity (all) | 3.11 | 0.016 | 0.103 | **0.95** | **0.042** |
| Abbreviations: QuickDASH, Quick Disabilities of the Arm, Shoulder and Hand questionnaire; GAD-7, Generalized Anxiety Disorder 7-item scale; PHQ-9, Patient Health 9-item questionnaire; FABQ-PA, Fear-Avoidance Beliefs Questionnaire for physical activity (FABQ-PA); WPAI, Work Productivity and Activity Impairment questionnaire.  Note: *If a significant chi-square is found for a model, then CFI values > .9, or RMSEA values < .08, or SRMR values <.05 signify models with acceptable fit (presented in bold). 76,77* | | | | | |

*Supplementary Table S5. Intent-to-treat Conditional Latent Growth Curve Model, with body mass index, age, sex GAD-7 and PHQ-9 as covariates*

|  | Age | | | Female | | | BMI | | | GAD-7 | | | | PHQ-9 | | |
| --- | --- | --- | --- | --- | --- | --- | --- | --- | --- | --- | --- | --- | --- | --- | --- | --- |
| Outcome | Intercept | Slope | Curve | Intercept | Slope | Curve | Intercept | Slope | Curve | Intercept | Slope | | Curve | Intercept | Slope | Curve |
| QuickDASH | **0.24  (< .001)** | -0.01 (0.543) | 0  (0.695) | **6.79  (< .001)** | **-1.33 (0.001)** | **0.08 (0.02)** | **0.26 (0.013)** | -0.02 (0.329) | 0  (0.661) | 0.22 (0.356) | 0.05 (0.485) | | 0  (0.532) | **0.76 (0.013)** | 0.03 (0.704) | 0  (0.469) |
| Pain Level | 0.02 (0.092) | 0 (0.329) | 0  (0.401) | 0.37 (0.089) | -0.09 (0.295) | 0.01 (0.371) | 0.01 (0.32) | 0  (0.889) | 0  (0.996) | 0.03 (0.429) | 0 (0.871) | | 0  (0.874) | 0.07 (0.127) | 0 (0.962) | 0  (0.923) |
| Surgery Intent >0 | -0.01 (0.939) | 0.03 (0.567) | 0  (0.911) | -7.18 (0.047) | -1.03 (0.379) | 0.08 (0.37) | 0.29 (0.269) | -0.06 (0.397) | 0.01 (0.263) | -0.31 (0.611) | 0.08 (0.64) | | -0.01 (0.698) | 1.34 (0.084) | -0.12 (0.66) | 0  (0.998) |
| Surgery Intent (all) | 0.09 (0.341) | -0.01 (0.703) | 0  (0.555) | **-7.28 (0.003)** | -0.05 (0.941) | 0.02 (0.705) | 0.32 (0.093) | -0.01 (0.787) | 0  (0.758) | -0.21 (0.618) | 0.03 (0.82) | | 0  (0.83) | 0.45 (0.367) | -0.06 (0.639) | 0  (0.766) |
| FABQ-PA | 0.01 (0.824) | **-0.03 (0.008)** | **0**  **(0.008)** | -0.82 (0.199) | 0.24 (0.25) | -0.02 (0.194) | -0.03 (0.506) | 0  (0.912) | 0  (0.527) | -0.07 (0.531) | 0.03 (0.479) | | 0  (0.238) | 0.17 (0.222) | -0.01 (0.742) | 0  (0.135) |
| GAD-7 ≥5 | 0  (0.963) | -0.01 (0.333) | 0  (0.272) | 1.07 (0.075) | -0.23 (0.377) | 0.02 (0.383) | -0.01 (0.746) | -0.02 (0.379) | 0  (0.515) | NA | NA | | NA | **0.44  (< .001)** | **-0.08 (0.003)** | 0  (0.123) |
| GAD-7 (all) | **-0.03 (0.03)** | 0  (0.518) | 0  (0.356) | **1.09  (< .001)** | -0.04 (0.744) | 0 (0.757) | **-0.05  (0.041)** | 0  (0.956) | 0  (0.84) | NA | NA | | NA | **0.77  (< .001)** | **-0.11  (< .001)** | **0.01  (< .001)** |
| PHQ-9 ≥5 | -0.03 (0.219) | 0  (0.94) | 0  (0.724) | **-1.52 (0.009)** | 0.08 (0.803) | 0.01 (0.774) | 0.06 (0.113) | 0.01 (0.643) | 0  (0.444) | **0.39  (< .001)** | **-0.07 (0.045)** | | 0  (0.292) | NA | NA | NA |
| PHQ-9 (all) | 0.02 (0.189) | 0  (0.326) | 0  (0.387) | -0.3 (0.309) | 0.08 (0.475) | 0  (0.739) | **0.07  (< .001)** | 0  (0.763) | 0  (0.868) | **0.6  (< .001)** | **-0.08  (< .001)** | | **0**  **(0.009)** | NA | NA | NA |
| WPAI Overall >0 | -0.22 (0.102) | 0.07 (0.107) | 0  (0.208) | 1.25 (0.663) | -0.23 (0.84) | 0.02 (0.848) | -0.03 (0.927) | 0.1 (0.202) | -0.01 (0.165) | 0.28 (0.601) | 0.23 (0.224) | | -0.01 (0.529) | **1.82 (0.002)** | -0.07 (0.763) | -0.01 (0.732) |
| WPAI Overall (all) | **-0.24 (0.018)** | **0.06 (0.039)** | 0  (0.119) | 2.69 (0.226) | 0.1 (0.878) | -0.02 (0.728) | 0.22 (0.32) | 0.04 (0.452) | -0.01 (0.203) | 0.18 (0.658) | 0.1 (0.384) | | 0  (0.802) | **1.5 (0.006)** | -0.07 (0.661) | 0  (0.811) |
| WPAI Work >0 | -0.16 (0.191) | 0.04 (0.363) | 0  (0.44) | 0.78 (0.777) | -0.23 (0.82) | 0.02 (0.817) | -0.3 (0.069) | 0.15 (0.059) | -0.01 (0.061) | 0.56 (0.294) | 0.15 (0.377) | | -0.01 (0.481) | **1.29 (0.028)** | 0.07 (0.742) | -0.01 (0.421) |
| WPAI Work (all) | **-0.22 (0.021)** | 0.05 (0.093) | 0  (0.233) | 1.68 (0.419) | 0.24 (0.694) | -0.02 (0.641) | -0.01 (0.945) | 0.09 (0.118) | -0.01 (0.088) | 0.3  (0.441) | 0.07 (0.495) | | 0  (0.828) | **1.19 (0.022)** | 0.02 (0.883) | -0.01 (0.45) |
| WPAI Activity >0 | 0  (0.982) | 0.01 (0.753) | 0  (0.993) | 2.54 (0.28) | 0.16 (0.843) | -0.04 (0.574) | 0.08 (0.674) | 0.06 (0.358) | -0.01 (0.305) | 0.41 (0.331) | 0.15 (0.323) | | -0.01 (0.375) | **1.25 (0.007)** | -0.05 (0.799) | -0.01 (0.736) |
| WPAI Activity (all) | 0  (0.962) | 0.02 (0.543) | 0  (0.703) | 1.65 (0.48) | 0.25 (0.734) | -0.04 (0.534) | 0.16 (0.397) | 0  (0.948) | 0  (0.836) | 0.32 (0.446) | 0.09 (0.495) | | 0  (0.674) | **1.56 (0.001)** | -0.03 (0.841) | -0.01 (0.536) |
| Abbreviations: QuickDASH, Quick Disabilities of the Arm, Shoulder and Hand questionnaire; GAD-7, Generalized Anxiety Disorder 7-item scale; PHQ-9, Patient Health 9-item questionnaire; FABQ-PA, Fear-Avoidance Beliefs Questionnaire for physical activity (FABQ-PA); WPAI, Work Productivity and Activity Impairment questionnaire.  Note: *All covariate p-values shown in parentheses. Significant p-values are presented in bold.* | | | | | | | | | | | |

*Supplementary Table S6.* *Baseline clinical outcomes and baseline – end of program changes of early completers vs completers*

|  | Baseline | | | |  | Change: baseline – end of program | | | |  |
| --- | --- | --- | --- | --- | --- | --- | --- | --- | --- | --- |
| Outcome measures | Completers | | Early completers | |  | Completers | | Early completers | |  |
| mean (SD) | N | mean (SD) | N | *p* | mean (SD) | N | mean (SD) | N | *p* |
| QuickDASH | 26.04 (12.0) | 216 | 19.82 (12.1) | 18 | **0.031** | 12.82 (9.0) | 133 | 10.23 (13.0) | 18 | 0.280 |
| Pain Level | 4.54 (1.8) | 216 | 4.39 (2.1) | 18 | 0.737 | 2.49 (1.8) | 138 | 2.94 (2.5) | 18 | 0.331 |
| Surgery intent | 12.88 (20.2) | 216 | 9.67 (12.5) | 18 | 0.333 | 6.44 (18.2) | 138 | 3.56 (18.5) | 18 | 0.528 |
| FABQ-PA | 11.85 (5.5) | 216 | 9.44 (4.2) | 18 | **0.034** | 4.53 (6.2) | 138 | 1.89 (5.6) | 18 | 0.087 |
| GAD-7 | 3.41 (3.9) | 216 | 1.44 (1.9) | 18 | **<.001** | 1.70 (3.9) | 138 | 0 (2.0) | 18 | 0.070 |
| PHQ-9 | 3.13 (3.3) | 216 | 1.11 (1.5) | 18 | **<.001** | 1.51 (3.5) | 138 | 0.17 (1.3) | 18 | **0.003** |
| WPAI Overall | 13.65 (17.6) | 183 | 7.86 (11.2) | 14 | 0.226 | 8.29 (18.5) | 115 | 5.71 (12.22) | 14 | 0.612 |
| WPAI Work | 12.40 (16.5) | 183 | 7.86 (11.2) | 14 | 0.312 | 6.96 (17.9) | 115 | 5.71 (12.2) | 14 | 0.802 |
| WPAI Activity | 24.24 (21.22) | 216 | 13.89 (14.6) | 18 | **0.054** | 12.90 (19.7) | 115 | 12.22 (14.4) | 18 | 0.888 |
| Abbreviations: QuickDASH, Quick Disabilities of the Arm, Shoulder and Hand questionnaire; GAD-7, Generalized Anxiety Disorder 7-item scale; PHQ-9, Patient Health 9-item questionnaire; FABQ-PA, Fear-Avoidance Beliefs Questionnaire for physical activity (FABQ-PA); WPAI, Work Productivity and Activity Impairment questionnaire.  Note: *Significant p-values are presented in bold.* | | | | | | | | | | |

*Supplementary Table S7. A. Responder analysis for primary outcome (QuickDASH) considering the MCID of 30% of change; B. Association of baseline variables with odds of being a responder.*

*A.*

|  | Responders | non-responders | Odds Ratio  (Responders) | Probability  (Responders) | z | *p* |
| --- | --- | --- | --- | --- | --- | --- |
| Unfiltered | 101 | 33 | 3.06 | 0.754 | 5.58 | **<.001** |
| Filtered | 100 | 33 | 3.03 | 0.752 | 5.52 | **<.001** |
| Note: *Significant p-values are presented in bold.* | | | | | | |

*B.*

|  | Parameter | Odds Ratio  (Responders) | 95% CI Lower | 95% CI Upper | z | *p* |
| --- | --- | --- | --- | --- | --- | --- |
| Unfiltered | Intercept | 2.81 | 1.88 | 4.52 | 4.65 | **< .001** |
|  | GAD-7 | 0.99 | 0.87 | 1.14 | -0.11 | 0.913 |
|  | PHQ-9 | 0.91 | 0.77 | 1.08 | -1.11 | 0.268 |
|  | Age | 0.96 | 0.92 | 1.00 | -1.77 | 0.077 |
|  | BMI | 1.03 | 0.96 | 1.11 | 0.83 | 0.405 |
|  | Sessions Per Week | 1.51 | 1.08 | 2.17 | 2.31 | **0.021** |
| Filtered | Intercept | 2.80 | 1.83 | 4.43 | 4.61 | **< .001** |
|  | GAD-7 | 0.99 | 0.87 | 1.14 | -0.11 | 0.910 |
|  | PHQ-9 | 0.91 | 0.77 | 1.08 | -1.10 | 0.272 |
|  | Age | 0.96 | 0.92 | 1.00 | -1.72 | 0.086 |
|  | BMI | 1.03 | 0.96 | 1.11 | 0.78 | 0.438 |
|  | Sessions Per Week | 1.53 | 1.09 | 2.21 | 2.37 | **0.018** |
| Abbreviations: GAD-7, Generalized Anxiety Disorder 7-item scale; PHQ-9, Patient Health 9-item questionnaire; BMI, Body mass index.  Note: *Significant p-values are presented in bold.* | | | | | | |
